# Supplementary material for: Surprisingly high levels and activity contributions of oxygenated volatile organic compounds on the southeast of the Tibetan Plateau
Source: Copernicus journal article supplement (doi:10.5194/egusphere-2024-262), 2024-02-19
Supplement: Supplementary file 1 [file egusphere-2024-262-supplement.pdf]

# Supplementary materials of Surprisingly high levels and activity contributions of oxygenated volatile organic compounds on the southeast of the Tibetan Plateau

4 Shuzheng Guo<sup>1</sup>, Chunxiang Ye<sup>2</sup>, Weili Lin<sup>1</sup>, Yi Chen<sup>1</sup>, Limin Zeng<sup>2</sup>, Xuena Yu<sup>2</sup>, Jinhui Cui<sup>2</sup>, Chong Zhang<sup>2</sup>, Jing Duan<sup>3</sup>, Haobin Zhong<sup>3</sup>, Rujin Huang<sup>3</sup>, Xuguang Chi<sup>4</sup>, Wei Nie<sup>4</sup>, Aijun Ding<sup>4</sup>

<sup>1</sup>Key Laboratory of Ecology and Environment in Minority Areas, Minzu University of China, National Ethnic Affairs Commission, Beijing 100081, China

8 <sup>2</sup>College of Environmental Science and Technology, Peking University, Beijing 100871, China

<sup>3</sup>Key Laboratory of Aerosol Chemistry and Physics, Institute of Earth Environment, Chinese Academy of Sciences, Xi'an 710075, China

12 <sup>4</sup>National Observation and Research Station for Atmospheric Processes and Environmental Change in Yangtze River Delta, Nanjing 210046, China

Correspondence: c.ye@pku.edu.cn, linwl@muc.edu.cn

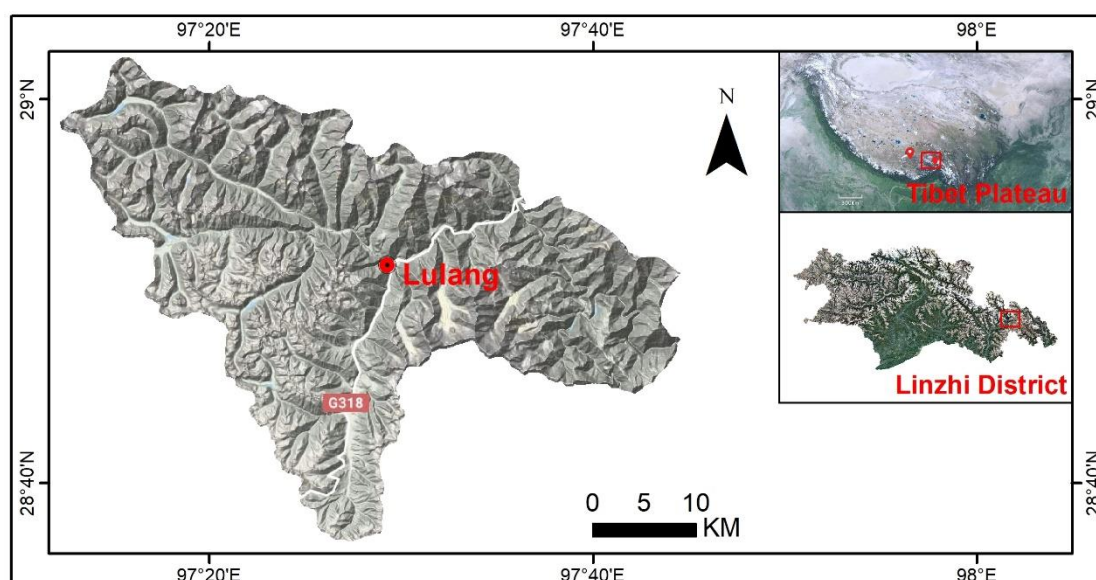

16 Fig. S1 The location and topography of the measurement site (reedited from map.baidu.com).

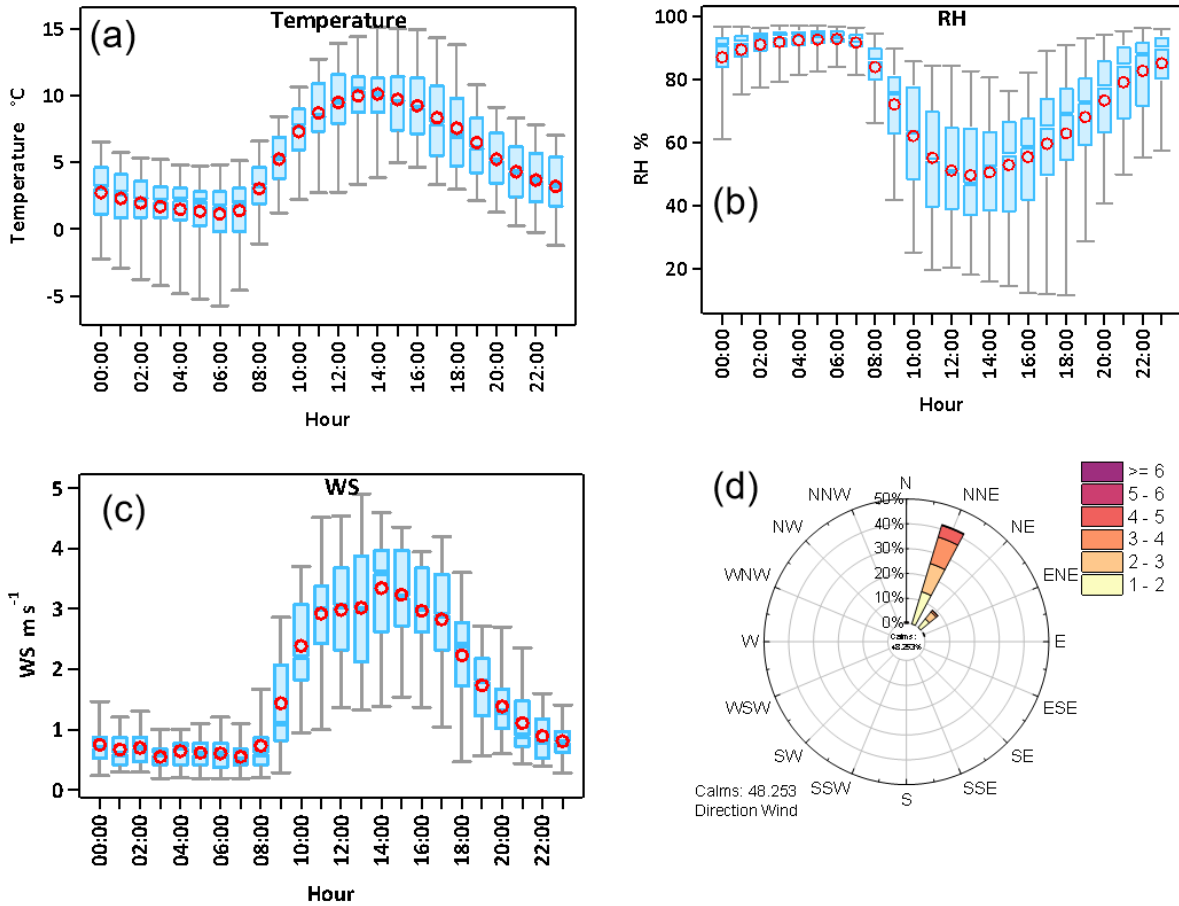

20 **Fig. S2.** Diurnal variations in air temperature (a), relative humidity (b), wind speed (c), and wind speed rose chart (d) during the observation period

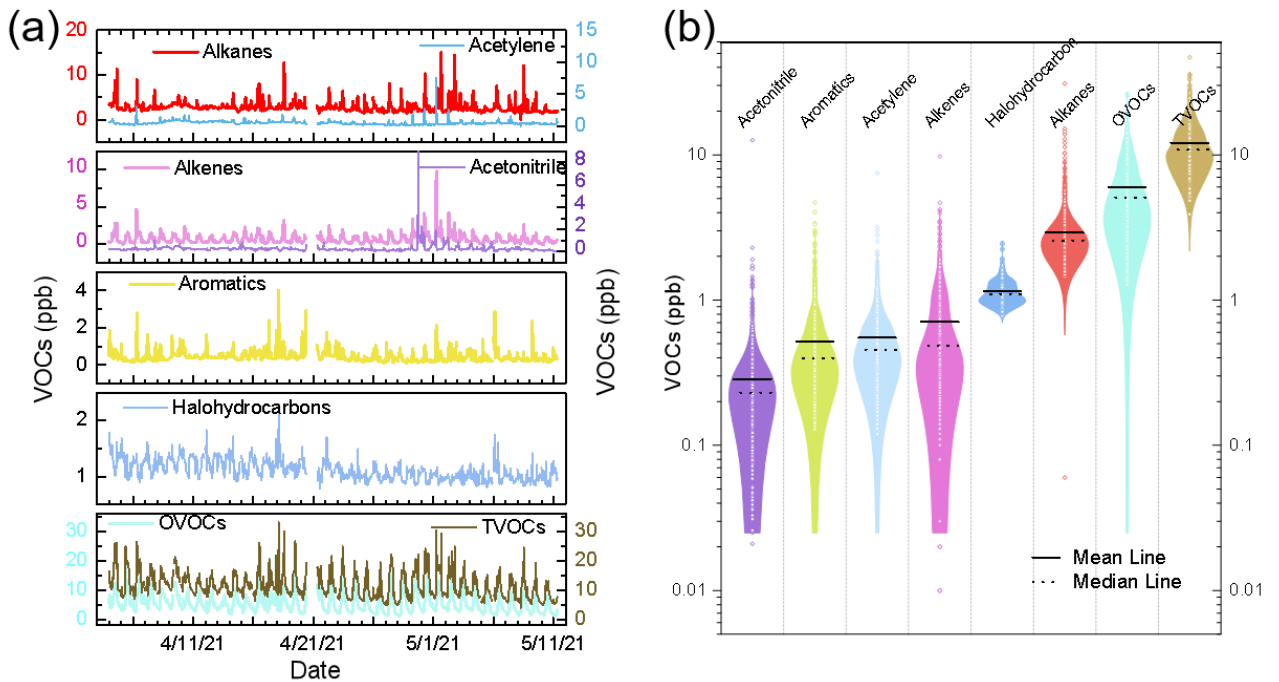

24 **Fig. S3.** (a) Time-series and (b) Violin distribution diagram of VOCs

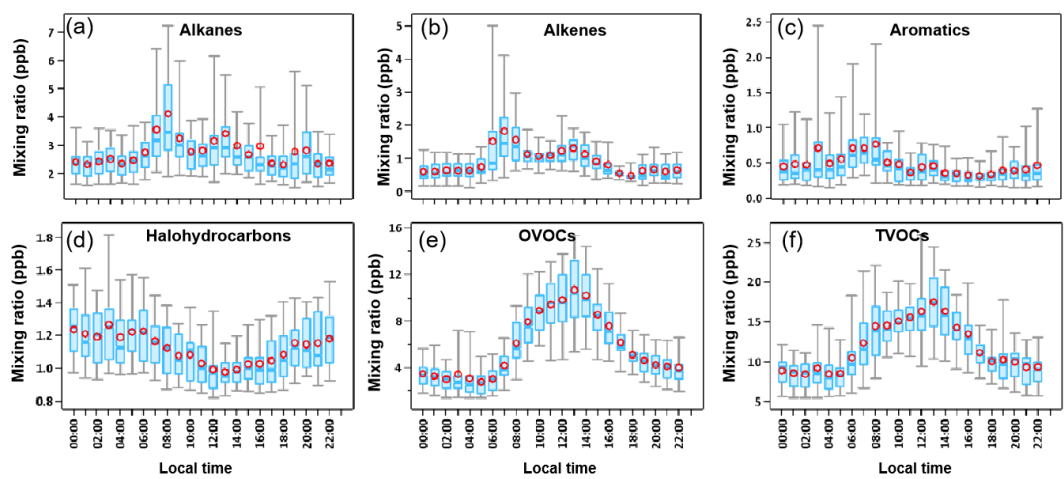

28 **Fig. S4 The diurnal variations in different VOCs**

Bar represents 25%-75% quartile, whisker represents 5% and 95% quartile, red circle indicates mean, and blue horizontal line represent the median.

32

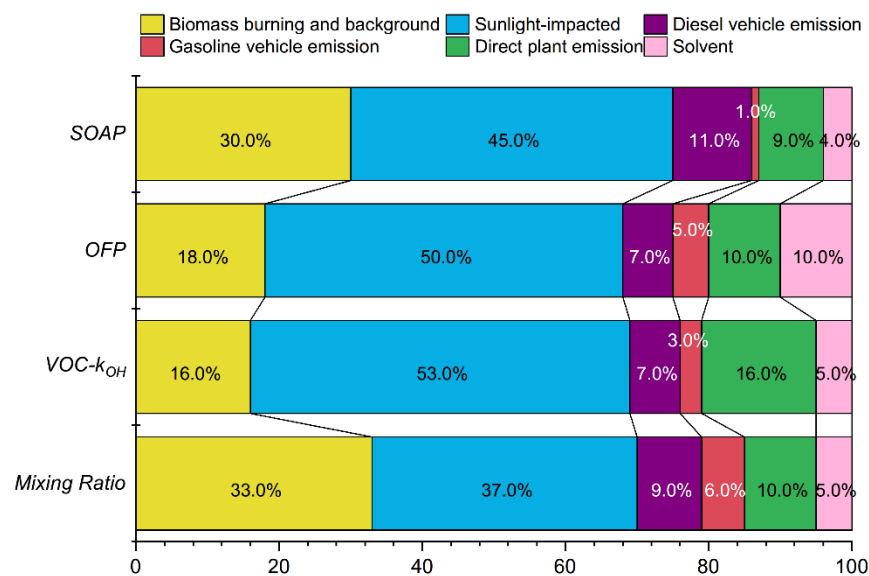

36 **Fig. S5 Contributions of six sources decomposed by PMF to mixing ratio, VOC-k<sub>OH</sub>, OFP and SOAP.**

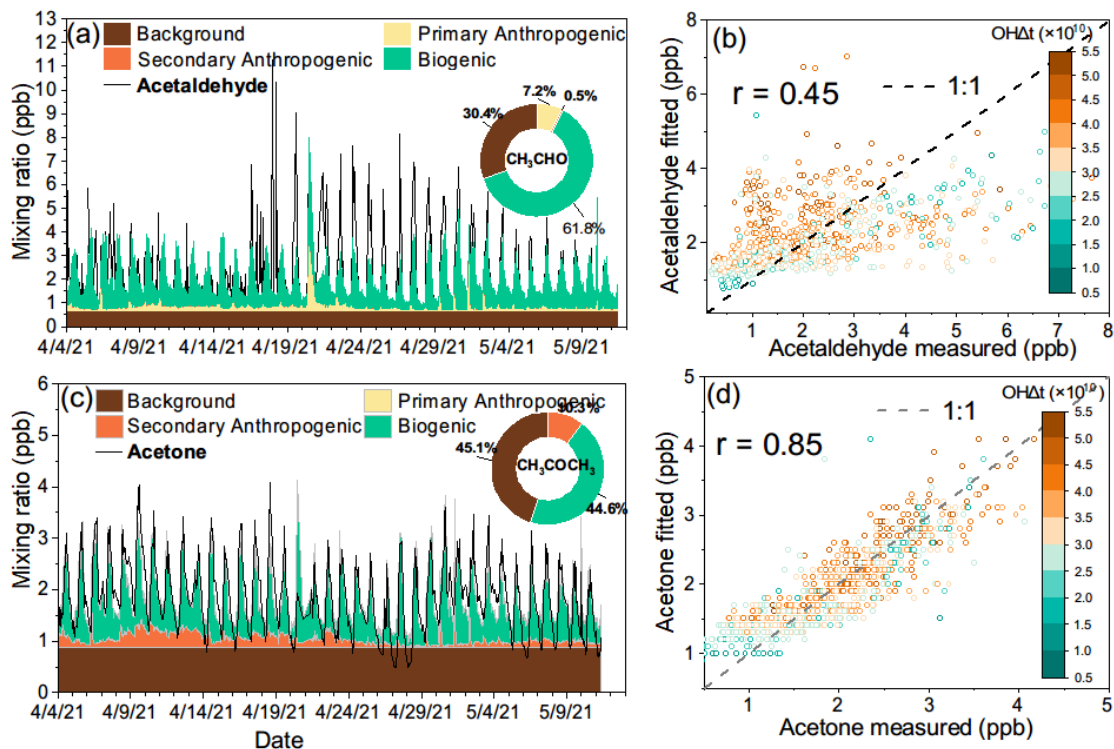

40 **Fig. S6** The four source concentrations of acetaldehyde (a) and acetone (c) by PAP and the time series of observed concentrations. The fitted and observation scatter plots of acetaldehyde (b) and acetone (d), marked color as hydroxyl exposure

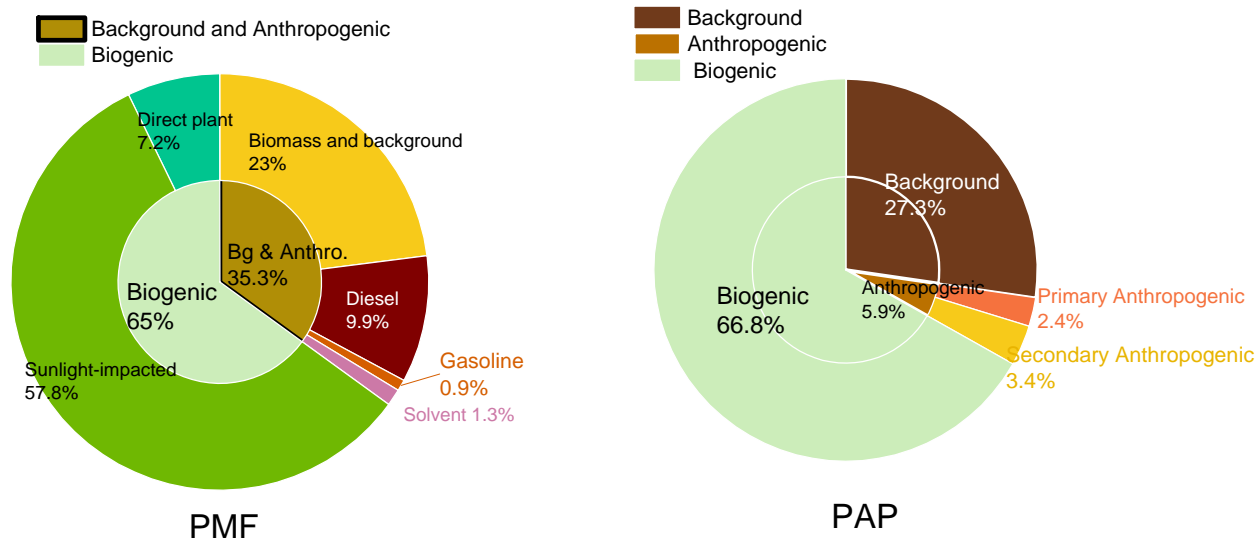

44 **Fig. S7.** Comparison of composition and contribution of biogenic source, anthropogenic sources and background of OVOCs analysed by methods of positive matrix factorization (PMF) and photochemical age-based parameterization (PAP).

48

**Table S1 Comparison of VOCs species levels at Lulang with other sites (Unit: ppb)**

| Site                              | Sampling Period     | Alkanes |         |                  |                  |                   |                   | Alkenes |         |          |                  | Alkyn  | Aromatics |         |              |                    |                  |
|-----------------------------------|---------------------|---------|---------|------------------|------------------|-------------------|-------------------|---------|---------|----------|------------------|--------|-----------|---------|--------------|--------------------|------------------|
|                                   |                     | Ethane  | Propane | <i>n</i> -butane | <i>i</i> -butane | <i>n</i> -pentane | <i>i</i> -pentane | Ethene  | Propene | Isoprene | $\alpha$ -pinene | Ethyne | Benzene   | Toluene | Ethylbenzene | <i>m,p</i> -xylene | <i>o</i> -xylene |
| Arctic <sup>a</sup>               | 2009.03-04          | 2.1     | 0.9     | 0.2              | 0.2              | 0.07              | 0.2               | -       | -       | -        | -                | 0.30   | 0.1       | 0.1     | 0.01         | -                  | -                |
| Arctic <sup>b</sup>               | Apr-Oct,2018        | -       | -       | -                | -                | -                 | -                 | -       | -       | -        | -                | -      | 0.03      | -       | -            | -                  | -                |
| Arctic <sup>c</sup>               | 2008.08-09          | 0.62    | 0.09    | 0.02             | -                | 0.01              | -                 | -       | -       | -        | -                | 0.06   | 0.02      | -       | -            | -                  | -                |
| Antarctic <sup>c</sup>            | 2007.12-<br>2008.01 | 0.10    | 0.01    | -                | -                | 0.00              | -                 | -       | -       | -        | -                | 0.02   | 0.01      | -       | -            | -                  | -                |
| Menyua <sup>d</sup>               | 2013.9-10           | -       | -       | -                | -                | -                 | -                 | -       | -       | -        | 0.06             | -      | 0.09      | 0.12    | 0.05         | 0.20               | 0.18             |
| WLG <sup>e</sup>                  | 2003.4-5.6-8        | 1.50    | 0.28    | 0.07             | 0.06             | 0.02              | 0.06              | 0.13    | 0.03    | 0.01     | 0.01             | 0.39   | 0.09      | 0.18    | 0.02         | 0.12               | 0.05             |
| Gongga <sup>f</sup>               | 2008-2011           | -       | -       | 0.20             | -                | 0.22              | 0.47              | -       | -       | 0.40     | 0.10             | -      | 0.72      | 0.44    | 0.28         | 0.28               | 0.31             |
| Tibet <sup>g</sup>                | 2010.10             | -       | 0.07    | -                | -                | -                 | 0.08              | -       | 0.05    | -        | -                | 0.14   | 0.02      | 0.03    | 0.01         | 0.01               | BDL              |
| Jianfeng Mt. <sup>h</sup>         | 2004.4-5            | 0.86    | 0.17    | 0.10             | 0.05             | 0.15              | 0.20              | 0.38    | 0.11    | 0.55     | 0.05             | 0.39   | 0.13      | 0.17    | 0.02         | 0.04               | BDL              |
| Tengchong Mt. <sup>h</sup>        | 2004.4-5            | 1.40    | 0.23    | 0.06             | 0.03             | 0.12              | 0.15              | 0.87    | 0.17    | 0.08     | 0.05             | 0.78   | 0.24      | 0.16    | 0.03         | 0.06               | 0.03             |
| Lin'an <sup>h</sup>               | 2004.4-5            | 2.63    | 1.31    | 0.73             | 0.51             | 0.29              | 0.46              | 1.73    | 0.33    | 0.4      | 0.17             | 2.18   | 0.75      | 2.64    | 0.33         | 0.32               | 0.15             |
| Tengyue <sup>h</sup>              | 2004.4-5            | 2.31    | 0.73    | 0.48             | 0.54             | 0.49              | 1.15              | 4.73    | 0.86    | 0.13     | 0.13             | 4.35   | 1.13      | 1.08    | 0.27         | 0.68               | 0.24             |
| Xianghe <sup>i</sup>              | 2017.11-2018.2      | 6.02    | 2.98    | 1.55             | 0.87             | 0.4               | 0.56              | 4.05    | 0.92    | 0.04     | -                | 2.13   | 0.92      | 0.97    | 0.36         | 1.02               | 0.32             |
| Lulang*                           | 2021,04-05          | 1.52    | 0.41    | 0.23             | 0.19             | 0.08              | 0.27              | 0.40    | 0.13    | 0.02     | 0.09             | 0.56   | 0.13      | 0.05    | 0.03         | 0.16               | 0.10             |
| Jungfraujoch <sup>j</sup>         | 2005 Spring         | -       | -       | 0.043            | -                | -                 | -                 | -       | -       | 0.001    | -                | -      | 0.025     | 0.07    | 0.018        | 0.075              | 0.007            |
| Mediterranean forest <sup>k</sup> | 2019 Summer         | -       | -       | -                | -                | -                 | -                 | -       | -       | 0.42     | -                | -      | 0.04      | 0.13    | -            | -                  | -                |

a. (Hornbrook et al., 2016); b. (Pernov et al., 2021); c. (Hellen et al., 2012); d. (Zhao et al., 2020); e. (Xue et al., 2013); f. (Zhang et al., 2014); g. (Li et al., 2017); h. (Tang et al., 2009); i. (Yang et al., 2020); j. (Legreid et al., 2008); k. (Yáñez-Serrano et al., 2021); \* This study.

**Table S2 Comparison of OVOCs species levels at Lulang with other sites (Unit: ppb)**

| Location                          | Period         | Methanol | Formaldehyde | Acetaldehyde | Acrolein | Methacrolein | Propanal | Acetone | MEK  | MVK  |
|-----------------------------------|----------------|----------|--------------|--------------|----------|--------------|----------|---------|------|------|
| Arctic <sup>a</sup>               | 2009.03-04     | 0.7      | -            | 0.1          | -        | -            | 0.02     | 0.9     | 0.19 | -    |
| Pittsburgh, US <sup>b</sup>       | 2002.7-8       | 10.70    | -            | 1.56         | -        | -            | -        | 4.03    | 0.56 | -    |
| Monterrey, Mexico <sup>c</sup>    | 2012.6         | -        | 26.10        | 11.60        | -        | -            | -        | 7.70    | 5.70 | -    |
| Beijing, China <sup>d</sup>       | 2005.6-8       | -        | 15.90        | 7.90         | -        | -            | -        | 8.70    | -    | -    |
| Beijing, China <sup>e</sup>       | 2010.6-9       | -        | 9.43         | 4.02         | -        | -            | -        | 2.90    | 0.65 | -    |
| Beijing, China <sup>f</sup>       | 2018.5-6       | 19.70    | 6.31         | 2.90         | -        | -            | -        | 4.16    | 1.00 | -    |
| Shanghai, China <sup>g</sup>      | 2007.7         | -        | 25.97        | 9.66         | -        | -            | -        | 5.46    | -    | -    |
| Hong Kong, China <sup>h</sup>     | 1999.5-8       | -        | 4.82         | 1.48         | -        | -            | -        | 0.29    | 0.10 | -    |
| Guangzhou, China <sup>i</sup>     | 2005.7         | -        | 11.20        | 5.89         | -        | -            | -        | 7.21    | 0.10 | -    |
| Shenzhen, China <sup>f</sup>      | 2018.4         | 6.10     | 1.60         | 1.16         | -        | -            | -        | 2.31    | 0.63 | -    |
| Xianghe, China <sup>j</sup>       | 2017.11-2018.1 | -        | -            | 1.22         | 0.13     | 0.02         | 0.23     | 0.97    | 0.32 | 0.04 |
| Changsha, China <sup>k</sup>      | 2015 Spring    | -        | 6.6          | 2.26         | -        | -            | -        | 1.91    | -    | -    |
| Lulang*, China                    | 2021.4-5       | -        | -            | 1.96         | 0.19     | 0.03         | 0.42     | 1.87    | 0.20 | 0.10 |
| WLG, China <sup>l</sup>           | 2005.8-9       | -        | 4.16         | 4.25         | -        | -            | -        | 2.02    | -    | 0.6  |
| New Mexico Forest <sup>m</sup>    | 1997 Summer    | -        | 2.3          | 1            | -        | 0.3          | -        | 1.2     | 1.3  | -    |
| Mediterranean forest <sup>n</sup> | 2019 Summer    | 4.6      | -            | 0.77         | -        | -            | -        | 2.08    | 0.29 | -    |

a. (Hornbrook et al., 2016); b. (Millet et al., 2005); c. (Menchaca-Torre et al., 2015); d. (Pang and Mu, 2006); e.(Wang et al., 2011); f.(Huang et al., 2020); g.(Huang et al., 2008); h. (Ho et al., 2002); i. (Lyu et al., 2010); j. (Yang et al., 2020); k. (Jiang et al., 2019); l. (Mu et al., 2007); m. (Villanueva-Fierro et al., 2004); n. (Yáñez-Serrano et al., 2021); \* This study;

**Table S3 OVOC sources fitting parameters by PAP**

| Species             | $ER_{\text{OVOC}}$              | $ER_{\text{pre}}$ | $k_{\text{pre}}$                                                         | $ER_{\text{bio}}$                | Background |
|---------------------|---------------------------------|-------------------|--------------------------------------------------------------------------|----------------------------------|------------|
|                     | ppb [ppb Benzene] <sup>-1</sup> |                   | 10 <sup>-12</sup> cm <sup>3</sup> molecule <sup>-1</sup> s <sup>-1</sup> | ppb [ppb Isoprene] <sup>-1</sup> | ppb        |
| Acetaldehyde        | 1.79                            | 1.00              | 2.00                                                                     | 2.86                             | 0.63       |
| Acrolein            | 0.01                            | 0.47              | 5.00                                                                     | 0.36                             | 0.03       |
| Propanal            | 0                               | 0.01              | 0.17                                                                     | 0.95                             | 0          |
| Acetone             | 0                               | 11.02             | 4.00                                                                     | 1.96                             | 0.88       |
| n-Butanal           | 0                               | 0.01              | 1.00                                                                     | 0.70                             | 0          |
| Methyl ethyl ketone | 0                               | 0.99              | 3.12                                                                     | 0.38                             | 0.03       |
| 2-Pentanone         | 0                               | 0                 | 0.05                                                                     | 0.10                             | 0          |
| n-Pentanal          | 0                               | 0.28              | 0                                                                        | 0.72                             | 0          |
| 3-Pentanone         | 0                               | 0.11              | 0                                                                        | 0.05                             | 0          |
| n-Hexanal           | 0                               | 0.30              | 0                                                                        | 0.95                             | 0          |

## References:

- Hellen, H., Leck, C., Paatero, J., Virkkula, A., and Hakola, H.: Summer concentrations of NMHCs in ambient air of the Arctic and Antarctic, *Boreal Environment Research*, 17, 385–397, 2012.
- Ho, K. F., Lee, S. C., Louie, P. K. K., and Zou, S. C.: Seasonal variation of carbonyl compound concentrations in urban area of Hong Kong, *Atmospheric Environment*, 36, 1259–1265, [https://doi.org/10.1016/S1352-2310\(01\)00570-2](https://doi.org/10.1016/S1352-2310(01)00570-2), 2002.
- Hornbrook, R. S., Hills, A. J., Riemer, D. D., Abdelhamid, A., Flocke, F. M., Hall, S. R., Huey, L. G., Knapp, D. J., Liao, J., Mauldin, R. L., Montzka, D. D., Orlando, J. J., Shepson, P. B., Sive, B., Staebler, R. M., Tanner, D. J., Thompson, C. R., Turnipseed, A., Ullmann, K., Weinheimer, A. J., and Apel, E. C.: Arctic springtime observations of volatile organic compounds during the OASIS-2009 campaign, *J. Geophys. Res.-Atmos.*, 121, 9789–9813, <https://doi.org/10.1002/2015JD024360>, 2016.
- Huang, J., Feng, Y., Jian, L., Xiong, B., Feng, J., Sheng, W., Sheng, G., Fu, J., and Wu, M.: Characteristics of carbonyl compounds in ambient air of Shanghai, China, *Journal of Atmospheric Chemistry*, 61, 1–20, <https://doi.org/10.1007/s10874-009-9121-x>, 2008.
- Huang, X.-F., Zhang, B., Xia, S.-Y., Han, Y., Wang, C., Yu, G.-H., and Feng, N.: Sources of oxygenated volatile organic compounds (OVOCs) in urban atmospheres in North and South China, *Environmental Pollution*, 261, 114152, <https://doi.org/10.1016/j.envpol.2020.114152>, 2020.
- Jiang, Z., Zheng, X., Zhai, H., Wang, Y., Wang, Q., and Yang, Z.: Seasonal and diurnal characteristics of carbonyls in the urban atmosphere of Changsha, a mountainous city in south-central China, *Environmental Pollution*, 253, 259–267, <https://doi.org/10.1016/j.envpol.2019.06.127>, 2019.
- Legreid, G., Folini, D., Staehelin, J., Lööv, J. B., Steinbacher, M., and Reimann, S.: Measurements of organic trace gases including oxygenated volatile organic compounds at the high alpine site Jungfrauoch (Switzerland): Seasonal variation and source allocations, *Journal of Geophysical Research Atmospheres*, 113, <https://doi.org/10.1029/2007JD008653>, 2008.
- Li, H., He, Q., Song, Q., Chen, L., Song, Y., Wang, Y., Lin, K., Xu, Z., and Shao, M.: Diagnosing Tibetan pollutant sources via volatile organic compound observations, *Atmospheric Environment*, 166, 244–254, <https://doi.org/10.1016/j.atmosenv.2017.07.031>, 2017.
- Lyu, H., Cai, Q., Wen, S., Chi, Y., Guo, S., Sheng, G., and Fu, J.: Seasonal and diurnal variations of carbonyl compounds in the urban atmosphere of Guangzhou, China, *Science of The Total Environment*, Vol.408, 3523–3529, 2010.
- Menchaca-Torre, H. L., Mercado-Hernández, R., Rodríguez-Rodríguez, J., and Mendoza-Domínguez, A.: Diurnal and seasonal variations of carbonyls and their effect on ozone concentrations in the atmosphere of Monterrey, Mexico, *Journal of the Air & Waste Management Association*, 65, 500–510, <https://doi.org/10.1080/10962247.2015.1005849>, 2015.
- Millet, D. B., Donahue, N. M., Pandis, S. N., Polidori, A., Stanier, C. O., Turpin, B. J., and Goldstein, A. H.: Atmospheric volatile organic compound measurements during the Pittsburgh Air Quality Study: Results, interpretation, and quantification of primary and secondary contributions, *Journal of Geophysical Research: Atmospheres*, 110, <https://doi.org/10.1029/2004JD004601>, 2005.
- Mu, Y., Pang, X., Quan, J., and Zhang, X.: Atmospheric carbonyl compounds in Chinese background area: A remote mountain of the Qinghai-Tibetan Plateau, *Journal of Geophysical Research (Atmospheres)*, 112, D22302, <https://doi.org/10.1029/2006JD008211>, 2007.
- Pang, X. and Mu, Y.: Seasonal and diurnal variations of carbonyl compounds in Beijing ambient air, *Atmospheric Environment*, 40, 6313–6320, <https://doi.org/10.1016/j.atmosenv.2006.05.044>, 2006.
- Pernov, J. B., Bossi, R., Lebourgeois, T., Nøjgaard, J. K., Holzinger, R., Hjorth, J. L., and Skov, H.: Atmospheric VOC measurements at a High Arctic site: characteristics and source apportionment, *Atmos. Chem. Phys.*, 21,



2895–2916, <https://doi.org/10.5194/acp-21-2895-2021>, 2021.

Tang, J. H., Chan, L. Y., Chang, C. C., Shaw Liu, and Y. S. Li: Characteristics and sources of non-methane hydrocarbons in background atmospheres of eastern, southwestern, and southern China, *Journal of Geophysical Research: Atmospheres*, Vol.114, <https://doi.org/10.1029/2008jd010333>, 2009.

Villanueva-Fierro, I., Popp, C. J., and Martin, R. S.: Biogenic emissions and ambient concentrations of hydrocarbons, carbonyl compounds and organic acids from ponderosa pine and cottonwood trees at rural and forested sites in Central New Mexico, *Atmospheric Environment*, 38, 249–260, <https://doi.org/10.1016/j.atmosenv.2003.09.051>, 2004.

Wang, Q., Shao, M., Wei, Q., Chen, W. T., Si-Hua, L. U., and Zhao, Y.: Spatial and temporal variations of ambient carbonyl compounds in Beijing and its surrounding areas, *Environmental Science*, 32, 3522, <https://doi.org/10.1007/s11783-010-0264-4>, 2011.

Xue, L. K., Wang, T., Guo, H., Blake, D. R., Tang, J., Zhang, X. C., Saunders, S. M., and Wang, W. X.: Sources and photochemistry of volatile organic compounds in the remote atmosphere of western China: results from the Mt. Waliguan Observatory, *Atmospheric Chemistry and Physics*, 13, 8551–8567, <https://doi.org/10.5194/acp-13-8551-2013>, 2013.

Yáñez-Serrano, A. M., Bach, A., Bartolomé-Català, D., Matthaios, V., Seco, R., Llusà, J., Filella, I., and Peñuelas, J.: Dynamics of volatile organic compounds in a western Mediterranean oak forest, *Atmospheric Environment*, 257, 118447, <https://doi.org/10.1016/j.atmosenv.2021.118447>, 2021.

Yang, Y., Wang, Y., Zhou, P., Yao, D., Ji, D., Sun, J., Wang, Y., Zhao, S., Huang, W., Yang, S., Chen, D., Gao, W., Liu, Z., Hu, B., Zhang, R., Zeng, L., Ge, M., Petäjä, T., Kerminen, V.-M., Kulmala, M., and Wang, Y.: Atmospheric reactivity and oxidation capacity during summer at a suburban site between Beijing and Tianjin, *Atmospheric Chemistry and Physics*, 20, 8181–8200, <https://doi.org/10.5194/acp-20-8181-2020>, 2020.

Zhang, J., Sun, Y., Wu, F., Sun, J., and Wang, Y.: The characteristics, seasonal variation and source apportionment of VOCs at Gongga Mountain, China, *Atmospheric Environment*, 88, 297–305, <https://doi.org/10.1016/j.atmosenv.2013.03.036>, 2014.

Zhao, R. J., Dou, X. Y., Zhang, N., Zhao, X. Y., Yang, W., Han, B., Yu, H., Azzi, M., Wang, Y., and Bai, Z. P.: The characteristics of inorganic gases and volatile organic compounds at a remote site in the Tibetan Plateau, *Atmospheric Research*, 234, 104740, <https://doi.org/10.1016/j.atmosres.2019.104740>, 2020.
